# Supplementary material
Source: PubMed Central journal article supplement (PMC8821959)
Supplement: mmc1.pdf [file mmc1.pdf]

YMTHE, Volume 30

## **Supplemental Information**

**$\beta$ -Cyclodextrin-containing polymer**

**treatment of cutaneous lupus**

**and influenza improves outcomes**

**Linsley Kelly, Lyra B. Olson, Rachel E. Rempel, Jeffrey I. Everitt, Dana Levine, Smita K. Nair, Mark E. Davis, and Bruce A. Sullenger**

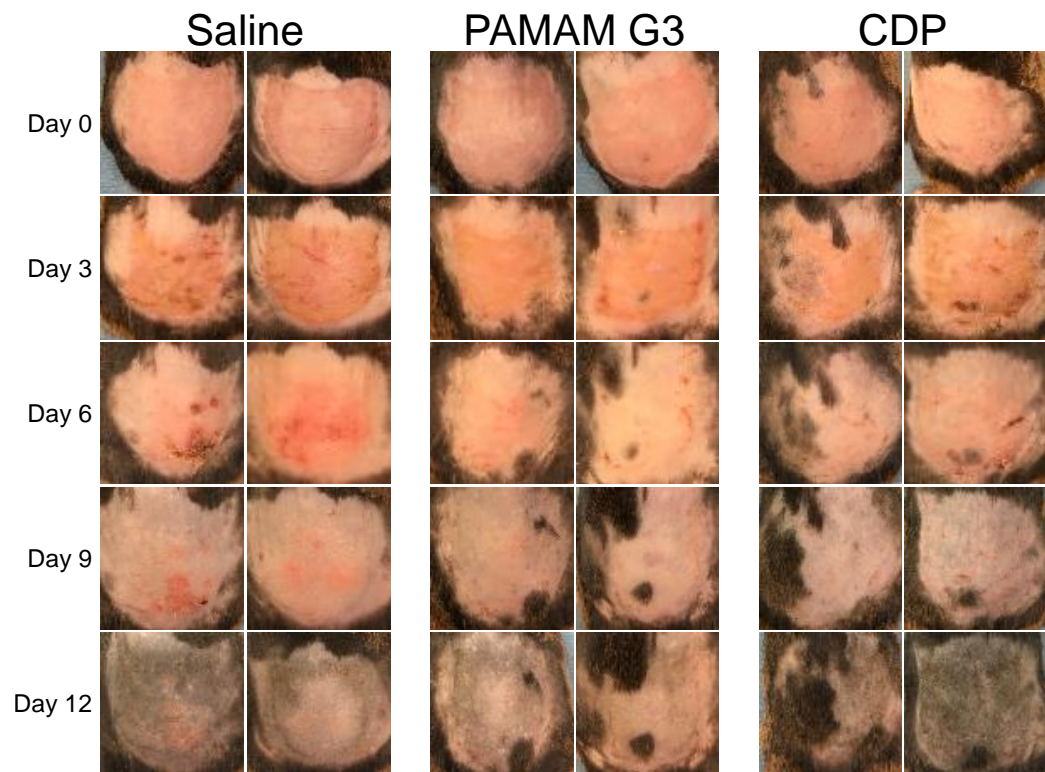

**Supplementary Figure 1:** Representative images of CLE mice treated subcutaneously with saline, PAMAM G3, or CDP.

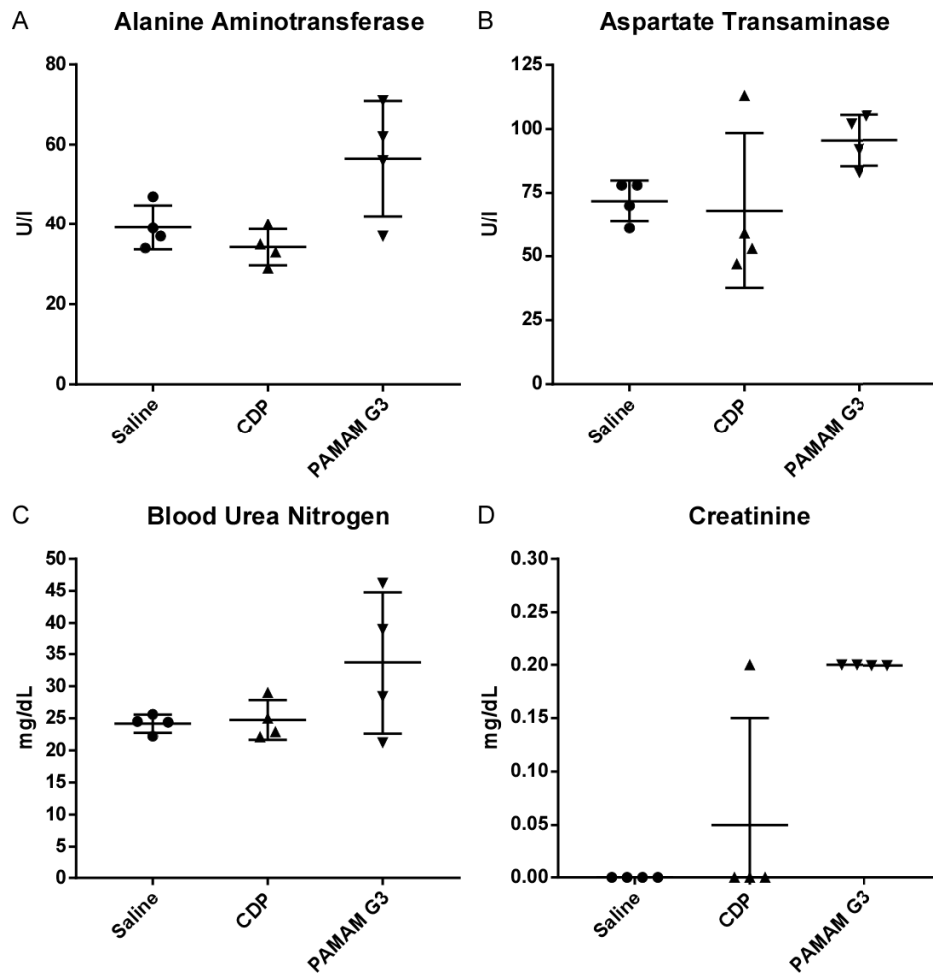

**Supplementary Figure 2:** Uninfected B6 mice were injected intraperitoneally with saline, 40mg/kg CDP, or 20mg/kg PAMAMG3 on days 0, 3, 6, and 9. Serum was collected on day 10, approximately 24 hours after the final dose. A comprehensive chemistry panel was run on serum and results for alanine aminotransferase (A), aspartate transaminase (B), blood urea nitrogen (C), and creatinine (D) are shown.
